# Supplementary material for: Predictors of Early-Recurrence Atrial Fibrillation after Catheter Ablation in Women and Men with Abnormal Body Weight
Source: MDPI journal article supplement (doi:10.3390/jcm10122694), 2021-06-18
Supplement: s1 [file s1]

## Supplementary Materials

**Table S1.** The sensitivities of the assays

| Parameter                 | Sensitivity |
|---------------------------|-------------|
| hsIL-6 pg/ml              | 0.04 pg/ml  |
| Pentraxin (PTX) ng/ml     | 0.06 ng/ml  |
| vWF ng/ml                 | 0.10 ng/ml  |
| sICAM-1 ng/ml             | 0.02 ng/ml  |
| sVCAM-1 ng/ml             | 0.01 ng/ml  |
| Thrombomodulin (TM) ng/ml | 0.03 ng/ml  |
| t-PA ng/ml                | 0.10 ng/ml  |
| PAI-1 ng/ml               | 0.14 ng/ml  |
| ST2 ng/ml                 | 0.04 ng/ml  |
| Leptin ng/ml              | 0.03 ng/ml  |
| Adiponectin µg/ml         | 0.93 µg/ml  |
| D-dimer                   | 0.5 µg/ml   |
| Hs-TnT                    | 14 pg/ml    |
| CRP                       | 0.5 mg/dl   |

*vWF*, von Willebrandt factor; *TM*, thrombomodulin; *s-ICAM*, intercellular adhesion molecule; *v-ICAM*, vascular cell adhesion molecule; *t-PA*, tissue plasminogen activator; *PAI*, plasminogen activator inhibitor-1; hs-TnT, high-sensitive cardiac troponin T; *CRP*, C-reactive protein

**Table S2.** Variables used for multivariate logistic regression analysis.

| No | VARIABLES                   |
|----|-----------------------------|
| 1  | Coronary artery disease     |
| 2  | Hypertension                |
| 3  | Thyroid diseases            |
| 4  | Dyslipidemia                |
| 5  | Heart Failure               |
| 6  | Anti-arrhythmic drugs       |
| 7  | Oral anticoagulants         |
| 8  | Beta-blokers                |
| 9  | Statins                     |
| 10 | ACEI                        |
| 11 | Sartans                     |
| 12 | Calcium channel blockers    |
| 13 | Diuretics                   |
| 14 | Smoking                     |
| 15 | HAS-BLED score              |
| 16 | CHA2DS2-VASC score          |
| 17 | EHRA score                  |
| 18 | Sex                         |
| 19 | Radiofrequency ablation     |
| 20 | Cryoballoon ablation        |
| 21 | Age                         |
| 22 | Weight                      |
| 23 | BMI                         |
| 24 | WC                          |
| 25 | Adiponektin                 |
| 26 | Leptin                      |
| 27 | Leptin to adiponectin ratio |
| 28 | Na                          |
| 29 | K                           |
| 30 | Glukose                     |
| 31 | Cholesterol                 |
| 32 | HDL                         |
| 33 | LDL                         |
| 34 | Triglyceride                |
| 35 | TSH                         |
| 36 | Urea                        |
| 37 | Creatinine                  |
| 38 | GFR                         |
| 39 | AlAT                        |
| 40 | AspAT                       |
| 41 | Procedure time (min)        |
| 42 | Fluoroscopic time (min)     |
| 43 | Number of application (min) |
| 44 | Application time (min)      |
| 45 | LA volume                   |
| 46 | LAVI                        |
| 47 | EF                          |

**Table S2. Cont.**

|    |                                                     |
|----|-----------------------------------------------------|
| 48 | SBP after ablation<br>SBP delta                     |
| 49 | DBP after ablation<br>DBP delta                     |
| 50 | hs IL-6 after ablation<br>hs IL-6 delta             |
| 51 | CRP after ablation<br>CRP delta                     |
| 52 | Pentraxin after ablation<br>Pentraxin delta         |
| 53 | WBC after ablation<br>WBC delta                     |
| 54 | Hs-Troponin T after ablation<br>Hs-Troponin T delta |
| 55 | CPK after ablation<br>CPK delta                     |
| 56 | CK-MB after ablation<br>CK-MB delta                 |
| 57 | vWF after ablation<br>vWF delta                     |
| 58 | TM after ablation<br>TM delta                       |
| 59 | sVCAM-1 after ablation<br>sVCAM-1 delta             |
| 60 | sICAM-1 after ablation<br>sICAM-1 delta             |
| 61 | t-PA – after ablation<br>t-PA-delta                 |
| 62 | PAI-1 after ablation<br>PAI-1 delta                 |
| 63 | PLT after ablation<br>PLT delta                     |

**Table S2. Cont.**

|    |                                         |
|----|-----------------------------------------|
| 64 | Fibrinogen after<br>Fibrinogen delta    |
| 65 | D-dimer after ablation<br>D-dimer delta |
| 66 | ST2 after ablation<br>ST2 delta         |

*ACE-I*, angiotensin converting enzyme inhibitor; *CHA<sub>2</sub>DS<sub>2</sub>-VASc*, Congestive heart failure, Hypertension, Age  $\geq 75$  (doubled), Diabetes, Stroke (doubled), Vascular disease, Age 65–74, Sex (female); *HAS-BLED*, Hypertension, Abnormal renal/liver function, Stroke, Bleeding history or predisposition, Labile INR, Elderly (>65 years), Drugs/alcohol concomitantly; *EHRA*, European Heart Rhythm Association; *BMI*, body mass index; *WC* – waist circumference; *GFR*, glomerular filtration rate; *LAVI*, left atrial volume index; *EF*, ejection fraction; *INR*, international normalized ratio; *SBP*, Systolic blood pressure; *DBP*, Diastolic blood pressure; *CRP*, C-reactive protein; *PLT*, platelets; *WBC*, white blood count; *hs-TnT*, high-sensitive cardiac troponin T; *vWF*, von Willebrandt factor; *TM*, thrombomodulin; *s-ICAM*, intercellular adhesion molecule; *v-ICAM*, vascular cell adhesion molecule; *t-PA*, tissue plasminogen activator; *PAI*, plasminogen activator inhibitor-1

**Table S3.** Multivariate logistic regression model of early recurrence atrial fibrillation created in the group of men.

| Variables | P value | OR    | 95 % CI        |
|-----------|---------|-------|----------------|
| ST2 delta | 0,011   | 1,68  | 1,115 – 2,536  |
| CCB       | <0.05   | 0,042 | 0,002 - 1,071  |
| smoking   | <0.05   | 39,25 | 1,050 – 1467,8 |

OR: odds ratio; CI: confidence interval; CCB: calcium channel blockers; CI: confidence intervals
